# Supplementary material
Source: publisher figshare collection journal article supplement (https://acs.figshare.com/ndownloader/files/4519714)
Supplement: Supplementary file 1 [file 4519714]

**Supporting Information for**  
**Cutting Ultrathin Gallium Oxide Nanoribbons**  
**into Nanoplates having Single Unit-Cell Thickness**

Juan Xu, Kwonho Jang, Hae Jin Kim, Dong-Hwa Oh, Joung Real Ahn\* and Seung Uk Son\*

*Department of Chemistry, Sungkyunkwan University, Suwon 440-746, Korea, Korea Basic  
Science Institute, Daejeon 350-333, Korea and Department of Physics, Sungkyunkwan University,  
Suwon 440-746, Korea*

**Experimental**

TEM, HRTEM images and EDS spectrum were recorded with a JEOL 2100F unit operated at 200 kV. The samples for TEM study were prepared by drop casting nanomaterials dispersed in methylene chloride on carbon-coated copper grids. The TEM studies were performed on as-prepared samples without employing size-selection process. Powder XRD patterns were obtained on a Rigaku Max-2200 with filtered  $\text{Cu}_{\text{K}\alpha}$  radiation. X-ray photoelectron spectroscopy (XPS) was obtained using a Thermo VG and Monochromatic  $\text{Al-K}\alpha$  radiation. PL studies were performed using Jasco-FP6200.

**Figure S1.** TEM image (a) of the assembled nanoplates and their HR-TEM image (b).

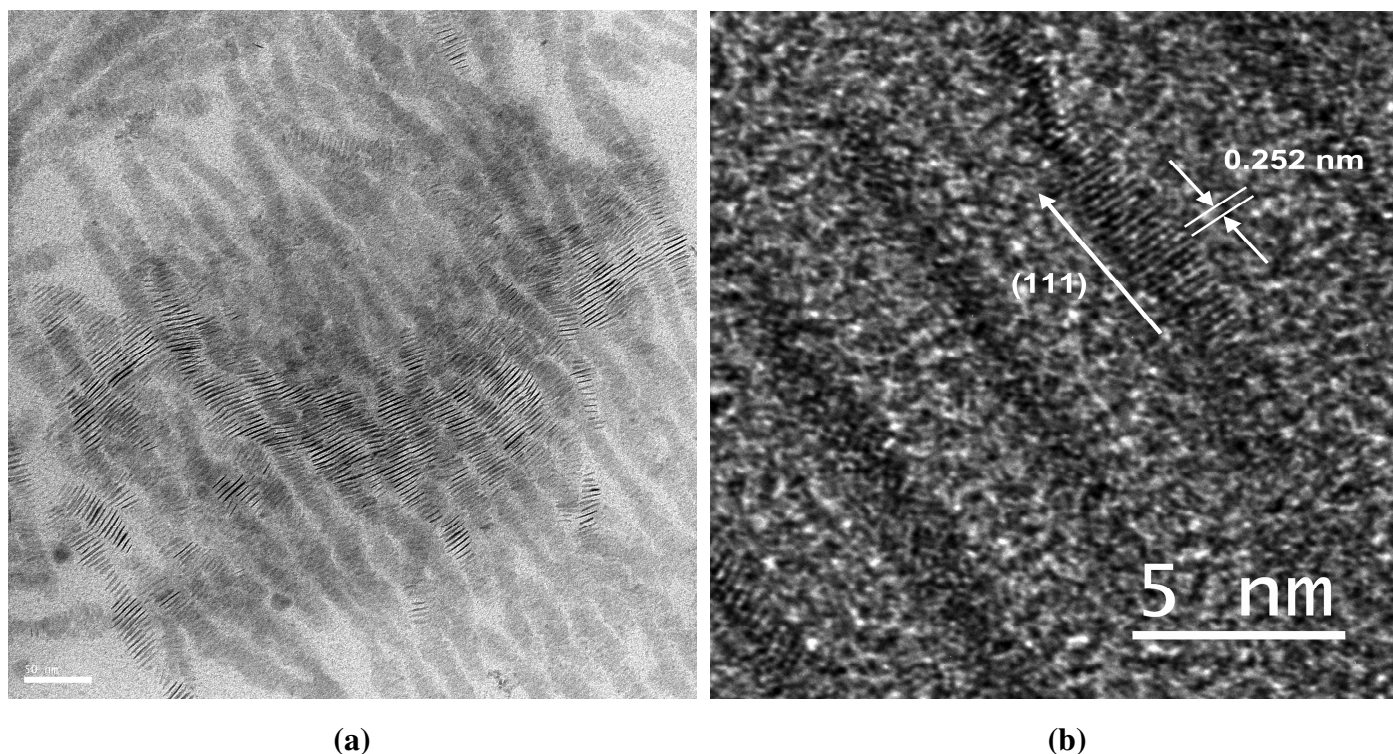

**Figure S2.** The analysis of the low angle –XRPD pattern (in Figure 3C of text) of nanoplates

| <b>2 theta (°)</b> | <b>observed distance(Å)</b> | <b>theoretical distance(Å)</b> |
|--------------------|-----------------------------|--------------------------------|
| <b>7.2</b>         | <b>12.3</b>                 | <b>12.3 (d/3)</b>              |
| <b>9.6</b>         | <b>9.2</b>                  | <b>9.2 (d/4)</b>               |
| <b>12.0</b>        | <b>7.4</b>                  | <b>7.4 (d/5)</b>               |
| <b>14.4</b>        | <b>6.2</b>                  | <b>6.1 (d/6)</b>               |

$$\mathbf{d = 36.8 \text{ \AA}}$$

## Simulation Method

The VASP code<sup>1</sup> was used for planewave pseudopotential calculations based on density functional theory. The exchange-correlation part of electron-electron interaction was described by local density approximation<sup>2</sup> and electron-ion interaction was described by projected augmented method.<sup>3</sup> Electron wavefunctions were expanded by planewaves up to kinetic energy cutoff of 250 eV. The simulated unit cell<sup>4</sup> has monoclinic structure with lattice parameters of  $a = 12.23 \text{ \AA}$ ,  $b = 3.04 \text{ \AA}$ ,  $c = 5.80 \text{ \AA}$  and  $\beta = 103.7^\circ$ , which contains 4 Ga atoms and 12 O atoms. We used  $1 * 4 * 2$  Monkhorst-Pack mesh<sup>5</sup> for the k-point sampling. For the structure relaxation, we used conjugate-gradient algorithm, where stopping criteria was maximal force on atoms of  $2 * 10^{-2} \text{ eV/\AA}$ .

## References

1. Kresse, G.; J. Furthmüller, J. *Comput. Mat. Sci.* **1996**, 6, 15.
2. Perdew, J. P.; Zunger, A. *Phys. Rev. B* **1981**, 23, 5048.
3. (a) Blöchl, P. E. *Phys. Rev. B* **1994**, 50, 17953. (b) Joubert, D.; Kresse, G. *Phys. Rev. B* **1999**, 59, 1758.
4. Geller, S. *J. Chem. Phys.* **1960**, 33, 676.
5. Monkhorst, H. J.; Pack, J. D. *Phys. Rev. B* **1976**, 13, 5188.

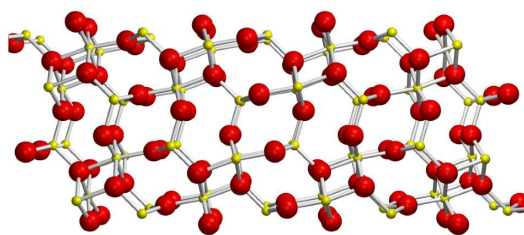

Ga-O1: 1.84, 1.95 Å  
Ga-O2: 1.85, 1.93 Å  
Ga-O3: 1.88, 2.01 Å

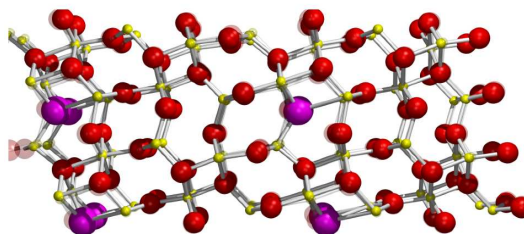

Ga-S1: 2.14, 2.26 Å

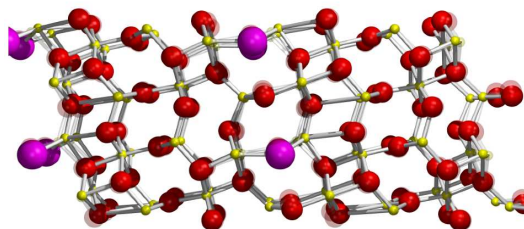

Ga-S2: 2.16, 2.22 Å

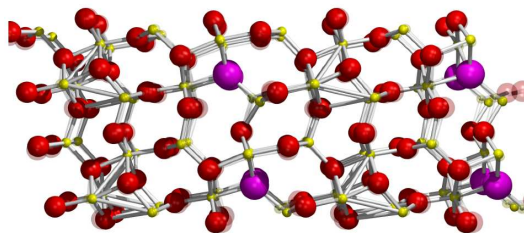

Ga-S3: 2.14, 2.26 Å
